# Supplementary material
Source: bioRxiv or medRxiv preprint supplement (https://medrxiv.org/highwire/filestream/87200/field_highwire_adjunct_files/0/2020.06.23.20138693-1.pdf)
Supplement: Supplementary file [file 2020.06.23.20138693-1.pdf]

# Supplementary Material

## Forecasting COVID-19 and Analyzing the Effect of Government Interventions

Michael Lingzhi Li<sup>a</sup>, Hamza Tazi Bouardi<sup>a</sup>, Omar Skali Lami<sup>a</sup>, Thomas A. Trikalinos<sup>c</sup>, Nikolaos K. Trichakis<sup>a,b</sup>, Dimitris Bertsimas<sup>\*a,b</sup>

<sup>a</sup>Operations Research Center, Massachusetts Institute of Technology, Cambridge, MA 02139

<sup>b</sup>Sloan School of Management, Massachusetts Institute of Technology, Cambridge, MA 02142

<sup>c</sup>Center for Evidence Synthesis in Health, Brown University, Providence, RI 02912

---

---

### 1. Mathematical Formulation of the DELPHI Model

Recall that the DELPHI model is a compartment epidemiological model that extends the classic SEIR model into 11 states under the following 8 groups:

- **Susceptible ( $S$ ):** People who have not been infected.
- **Exposed ( $E$ ):** People currently infected, but not contagious and within the incubation period.
- **Infected ( $I$ ):** People currently infected and contagious.
- **Undetected ( $U_R$ ) & ( $U_D$ ):** People infected and self-quarantined due to the effects of the disease, but not confirmed due to lack of testing. Some of these people recover ( $U_R$ ) and some deacease ( $U_D$ ).
- **Detected, Hospitalized ( $DH_R$ ) & ( $DH_D$ ):** People who are infected, confirmed, and hospitalized. Some of these people recover ( $DH_R$ ) and some deacease ( $DH_D$ ).
- **Detected, Quarantine ( $DQ_R$ ) & ( $DQ_D$ ):** People who are infected, confirmed, and home-quarantined rather than hospitalized. Some of these people recover ( $DQ_R$ ) and some deacease ( $DQ_D$ ).
- **Recovered ( $R$ ):** People who have recovered from the disease (and assumed to be immune).
- **Deceased ( $D$ ):** People who have perished from the disease.

In addition to main functional states, we introduce auxiliary states to calculate a few useful quantities: Total Hospitalized (TH), Total Detected deaths (DD) and Total Detected Cases (DT).

---

\*Corresponding author, dbertsim@mit.edu. M.L.L, H.T.B, O.S.L, T.A.T, N.K.T, D.B designed the study, M.L.L, H.T.B, O.S.L acquired data, carried out analysis and formulated the results. M.L.L, H.T.B, O.S.L, T.A.T, N.K.T, D.B wrote the manuscript.

The full mathematical formulation of the model is as follows:

$$\frac{dS}{dt} = -\tilde{\alpha}\gamma(t)S(t)I(t) \quad (1)$$

$$\frac{dE}{dt} = \tilde{\alpha}\gamma(t)S(t)I(t) - \beta E(t) \quad (2)$$

$$\frac{dI}{dt} = \beta E(t) - r_d I(t) \quad (3)$$

$$\frac{dU_R}{dt} = r_d(1 - \tilde{\mu})(1 - p_d)I(t) - \sigma U_R(t) \quad (4)$$

$$\frac{dDH_R}{dt} = r_d(1 - \tilde{\mu})p_d p_h I(t) - \kappa DH_R(t) \quad (5)$$

$$\frac{dDQ_R}{dt} = r_d(1 - \tilde{\mu})p_d(1 - p_h)I(t) - \sigma DQ_R(t) \quad (6)$$

$$\frac{dU_D}{dt} = r_d \tilde{\mu}(1 - p_d)I(t) - \tilde{\tau} U_D(t) \quad (7)$$

$$\frac{dDH_D}{dt} = r_d \tilde{\mu} p_d p_h I(t) - \tilde{\tau} DH_D(t) \quad (8)$$

$$\frac{dDQ_D}{dt} = r_d \tilde{\mu} p_d(1 - p_h)I(t) - \tilde{\tau} DQ_D(t) \quad (9)$$

$$\frac{dTH}{dt} = r_d p_d p_h I(t) \quad (10)$$

$$\frac{dDD}{dt} = \tilde{\tau}(DH_D(t) + DQ_D(t)) \quad (11)$$

$$\frac{dDT}{dt} = r_d p_d I(t) \quad (12)$$

$$\frac{dR}{dt} = \sigma(U_R(t) + DQ_R(t)) + \kappa DH_R(t) \quad (13)$$

$$\frac{dD}{dt} = \tilde{\tau}(U_D(t) + DQ_D(t) + DH_D(t)) \quad (14)$$

19 Where:

- 20 •  $\tilde{\alpha}$  is the baseline infection rate.  
 21 •  $\gamma(t)$  measures the government response and is defined as:

$$\gamma(t) = \frac{2}{\pi} \arctan\left(\frac{-(t - \tilde{t}_0)}{\tilde{k}}\right) + 1,$$

22 where the parameters  $\tilde{t}_0$  and  $\tilde{k}$  capture, respectively, the start date and the strength of the  
 23 response.

- 24 •  $r_d$  is the rate of detection. This equals to  $\frac{\log 2}{T_d}$ , where  $T_d$  is the median time to detection  
 25 (assumed to be 2 days).  
 26 •  $\beta$  is the rate of infection leaving incubation phase. This equals to  $\frac{\log 2}{T_\beta}$ , where  $T_\beta$  is the  
 27 median time to leave incubation (assumed to be 5 days).  
 28 •  $\sigma$  is the rate of recovery not under hospitalization. This equals to  $\frac{\log 2}{T_\sigma}$ , where  $T_\sigma$  is the  
 29 median time to recovery when a patient is not under hospitalization (assumed to be 10  
 30 days).

- 31 •  $\kappa$  is the rate of recovery under hospitalization. This equals to  $\frac{\log 2}{T_\kappa}$ , where  $T_\kappa$  is the median  
32 time to recovery under hospitalization (assumed to be 15 days).
  - 33 •  $\tilde{\tau}$  is the rate of death.
  - 34 •  $\tilde{\mu}$  is the mortality rate.
  - 35 •  $p_d$  is the percentage of infection cases detected. This percentage is constant and is set to  
36 20%.
  - 37 •  $p_h$  is the percentage of detected cases hospitalized. This percentage is also constant and  
38 set to 15%.
- 39 Therefore, we fit on 5 parameters from the list above  $(\tilde{\alpha}, \tilde{\mu}, \tilde{\tau}, \tilde{t}_0, \tilde{k})$ . In addition, we create two  
40 additional parameters  $\tilde{k}_1, \tilde{k}_2$  to account for the unknown initial population in the infected ( $I$ )  
41 and exposed ( $E$ ) states. We thus fit seven parameters per area.

42 **2. Induced Dependence from Recovery and Death Modeling**

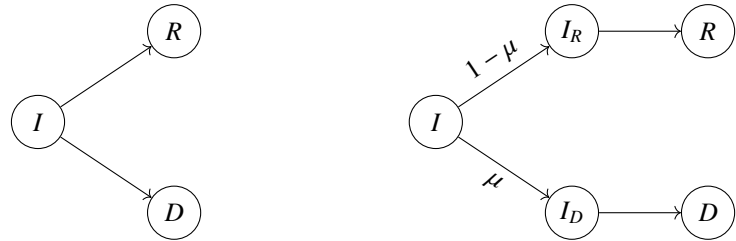

(a) Standard Modeling for Recoveries and Deaths

(b) Updated Modeling for Recoveries and Deaths

Figure 1: Modeling Recoveries and Deaths

43 Assume that recoveries and deaths are modeled as shown in Figure 1a. Then the outflow  
 44 from the  $I$  state, denoted  $I^-$ , can be written as followed:

$$\frac{dI^-}{dt} = -(\nu + \tau)I$$

45 Where  $\nu$  is the rate of recovery and  $\tau$  is the rate of death. This state dependent model implies a  
 46 mortality rate of  $\frac{\nu}{\nu + \tau}$ , which is fixed given the rate of recovery and the rate of death. However,  
 47 in reality, the mortality rate should be independent from how fast people recover or die.

48 **3. Illustration of Different Phases of Modeling Governmental Response**

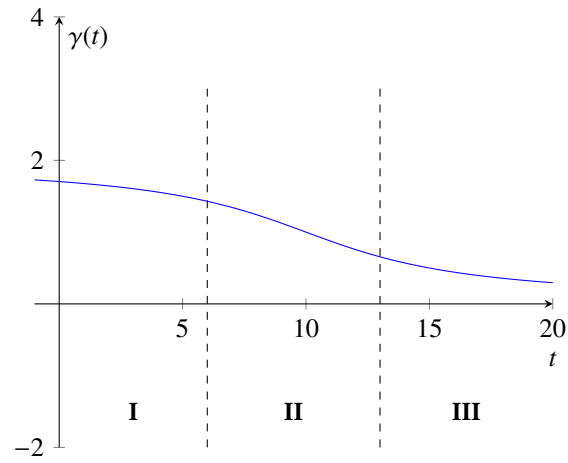

Figure 2: Illustration of  $\gamma(t) = \frac{2}{\pi} \arctan\left(-\frac{t-10}{5}\right) + 1$  (i.e.,  $\tilde{t}_0 = 10$  and  $\tilde{k} = 5$ ).

49 **4. Detailed Forecasting Results for the World**

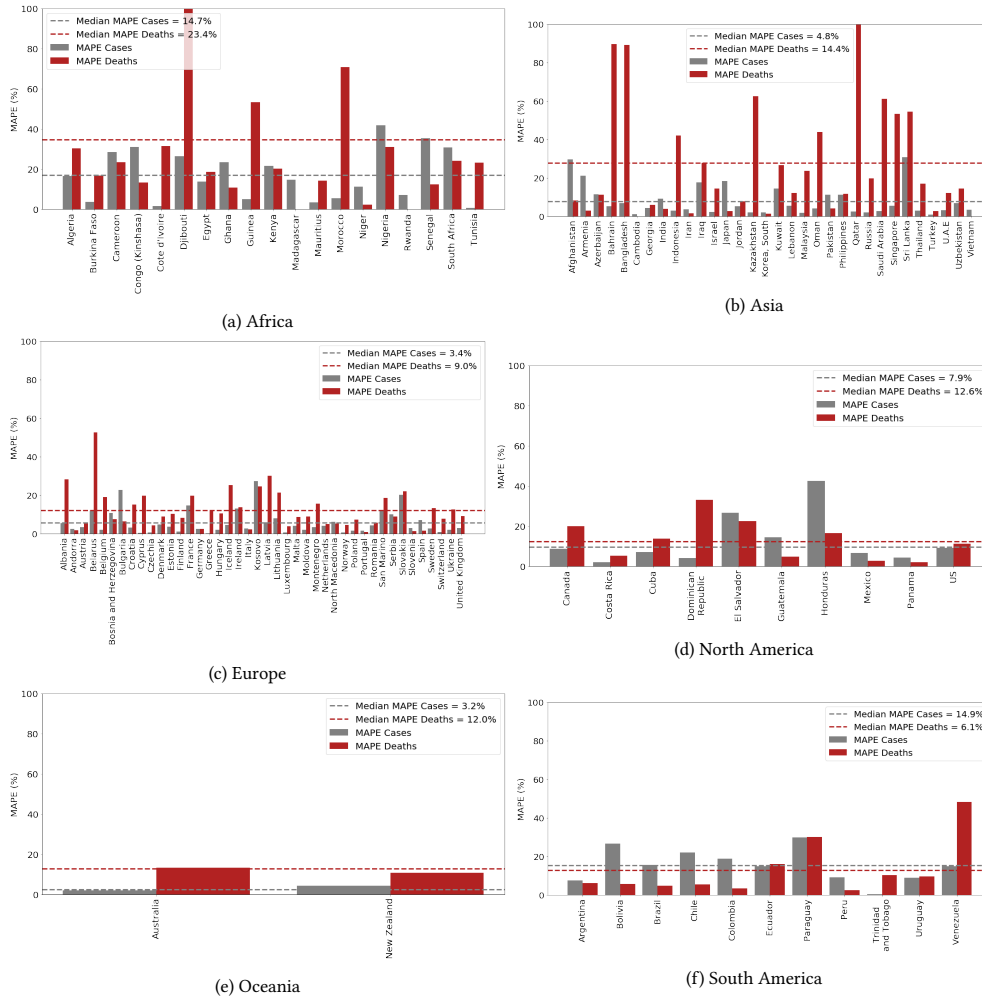

Figure 3: Mean Absolute Percentage Error (MAPE) of the predicted number of cases and decreases in each country (projections made using data up to 04/27 for the period from 04/28 to 05/12).

50 **5. Examples of Areas with large MAPE**

Table 1: Breakdown of number of deaths vs. MAPE on deaths for large errors.

| <b>Country/Province</b>                   | Bahrain | Djibouti | Guinea | Kazakhstan | Sri Lanka | Oman  | Qatar  | Venezuela |
|-------------------------------------------|---------|----------|--------|------------|-----------|-------|--------|-----------|
| <b>Number of deaths as of May 11 2020</b> | 8       | 3        | 11     | 32         | 9         | 17    | 14     | 10        |
| <b>MAPE on deaths</b>                     | 89.6%   | 193.1%   | 53.3%  | 62.6%      | 54.5%     | 44.0% | 106.9% | 48.1%     |

51 **6. Correspondence between Policy Data and Categorized Policies**

| Oxford Policy                                                                                       | Categorized Policy           |
|-----------------------------------------------------------------------------------------------------|------------------------------|
| C3: Cancel Public Events<br>C4: Restrictions on gatherings<br>C5: Close public transport            | Restrict Mass Gatherings     |
| C2: Workplace closing<br>C7: Restrictions on internal movement<br>C8: International travel controls | Travel and Work Restrictions |
| C1: School closing                                                                                  | School Restrictions          |
| C6: Stay at home requirements                                                                       | Stay-at-Home Order           |

Table 2: Correspondence between Oxford Policy Data and Categorized Policies.

| IHME Policy                                                                    | Categorized Policy           |
|--------------------------------------------------------------------------------|------------------------------|
| Mass Gathering Restrictions                                                    | Restrict Mass Gatherings     |
| Business Closure<br>Non-essential Businesses Closed<br>Travel Severely Limited | Travel and Work Restrictions |
| Educational Facilities Closed                                                  | School Restrictions          |
| Stay-at-Home Order                                                             | Stay-at-Home Order           |

Table 3: Correspondence between IHME Policy Data and Categorized Policies.



52 **7. Additional Results for Reopening Strategies**

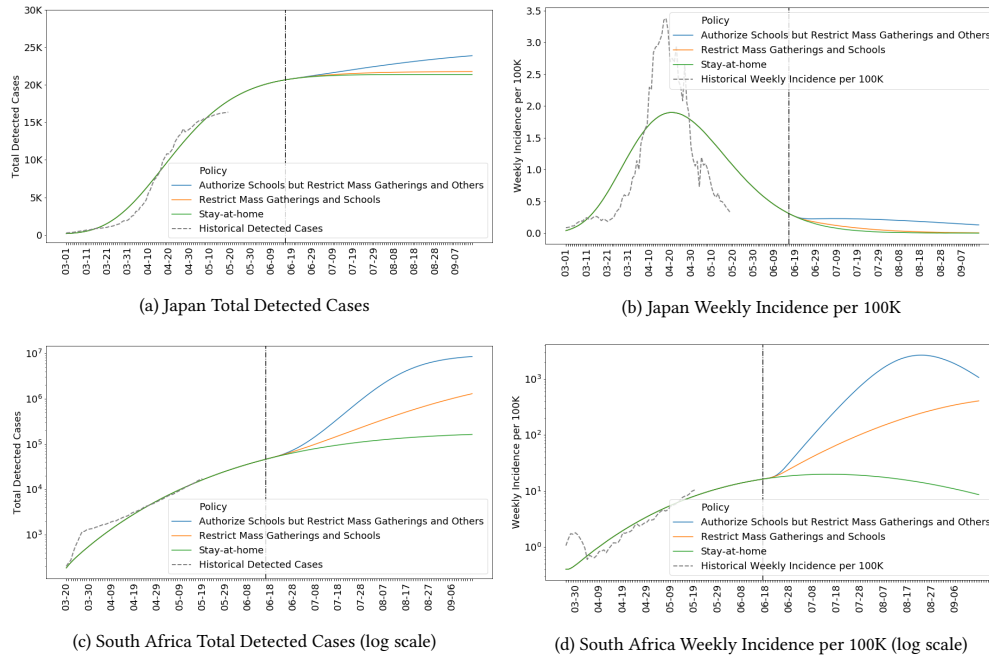

Figure 4: Forecasts of total detected cases and weekly incidence per 100K for Japan and South Africa under various policies
